# Novel pathogen introduction rapidly alters evolved movement strategies, restructuring animal societies

Pratik Rajan Gupte<sup>1,\*</sup>, Gregory F. Albery<sup>2,2b</sup>,  
Jakob Gismann<sup>1</sup>, Amy R. Sweeny<sup>3</sup>, Franz J. Weissing<sup>1</sup>

1. Groningen Institute for Evolutionary Life Sciences, University of Groningen, Groningen, The Netherlands.

2. Wissenschaftskolleg zu Berlin, Berlin, Germany.

2b. Georgetown University, Washington, DC, USA.

3. Institute of Evolutionary Biology, University of Edinburgh, Edinburgh, UK.

\* Corresponding author; e-mail: [p.r.gupte@rug.nl](mailto:p.r.gupte@rug.nl) or [pratikgupte16@gmail.com](mailto:pratikgupte16@gmail.com)

## ORCID

- PRG — 0000-0001-5294-7819
- GFA — 0000-0001-6260-2662
- JG — 0000-0002-2570-590X
- ARS — 0000-0003-4230-171X
- FJW — 0000-0003-3281-663X

*Keywords:* Sociality, Social networks, Individual-based modelling, Epizootics, Individual differences

## Abstract

1

2 Animal sociality emerges from individual decisions on how to balance the costs and benefits of being  
3 sociable. Movement strategies incorporating social information — the presence and status of neigh-  
4 bours — can modulate spatial associations, helping animals avoid infection while benefiting from in-  
5 direct information about their environment. When a novel pathogen is introduced into a population,  
6 it should increase the costs of sociality, selecting against gregariousness. Yet current thinking about  
7 novel pathogen introductions into wildlife neglects hosts' potential evolutionary responses. We built  
8 an individual-based model that captures essential features of the repeated introduction, and subsequent  
9 transmission of an infectious pathogen among social hosts. Examining movements in a foraging con-  
10 text, widely shared by many species, we show how introducing a novel pathogen to a population pro-  
11 vokes a rapid evolutionary transition to a dynamic social distancing movement strategy. This evolution-  
12 ary shift triggers a disease-dominated ecological cascade of increased individual movement, decreased  
13 resource harvesting, and fewer social encounters. Pathogen-risk adapted individuals form less clustered  
14 social networks than their pathogen-risk naive ancestors, which reduces the spread of disease. The mix  
15 of post-introduction social movement strategies is influenced by the usefulness of social information  
16 and disease cost. Our work demonstrates that evolutionary adaptation to pathogen introductions and  
17 re-introductions can be very rapid, comparable to ecological timescales. Our general modelling frame-  
18 work shows why evolutionary dynamics should be considered in movement-disease models, and offers  
19 initial predictions for the eco-evolutionary consequences of wildlife pathogen spillover scenarios.

## Introduction

20  
21 Animal sociality emerges from individual decisions that balance the benefits of associations against the  
22 costs of proximity or interactions with neighbours (Tanner and Jackson 2012; Gil et al. 2018; Webber  
23 and Vander Wal 2018; Webber et al. 2022). While such associations can inadvertently or deliberately  
24 yield useful social information about resource availability (Danchin et al. 2004; Dall et al. 2005; Gil  
25 et al. 2018), they also provide opportunities for the transmission of parasites and infectious pathogens  
26 among associating individuals (Weinstein et al. 2018; Romano et al. 2020; Albery et al. 2021; Cantor et  
27 al. 2021; Romano et al. 2021). Wildlife pathogen outbreaks affect most animal taxa, including mammals  
28 (Bleher et al. 2009; Fereidouni et al. 2019; Chandler et al. 2021; Kuchipudi et al. 2022), birds (Wille and  
29 Barr 2022), amphibians (Scheele et al. 2019), and social insects (Goulson et al. 2015). Weighing the  
30 potential risk of infection from social interactions against the benefits of social movements — where  
31 to move in relation to other individuals' positions — is thus a common behavioural context shared  
32 by many animal species. Movement strategies incorporating social information — the presence and  
33 status of neighbours — can facilitate or reduce spatial associations, and help animals balance the costs  
34 and benefits of sociality (Gil et al. 2018; Webber and Vander Wal 2018; Albery et al. 2021; Webber et  
35 al. 2022). Animals' social movements link landscape spatial structure, individual distributions, and the  
36 emergent structure of animal societies (Kurvers et al. 2014; Gil et al. 2018; Webber et al. 2022). Together,  
37 they influence the dynamics of disease outbreaks in animal populations (Keeling et al. 2001; White et al.  
38 2018a; Romano et al. 2020; 2021), and such outbreaks may in turn have cascading effects on landscape  
39 structure and community ecology (Monk et al. 2022).

40 On ecological timescales, pathogen outbreaks often reduce social interactions among individuals.  
41 This is due to a combination of mortality-induced decreases in population density (e.g. Fereidouni et  
42 al. 2019; Monk et al. 2022), and adaptive behavioural responses by which animals reduce encounters  
43 between infected and healthy individuals (Stroeymeyt et al. 2018; Weinstein et al. 2018; Pusceddu et al.  
44 2021; Stockmaier et al. 2021). The latter case includes self-isolating when infected, or avoiding poten-  
45 tially infectious individuals (Stroeymeyt et al. 2018; Weinstein et al. 2018; Pusceddu et al. 2021; Stock-  
46 maier et al. 2021). However, when pathogens are first introduced into a population, such as during novel  
47 cross-species spillover (Chandler et al. 2021; Kuchipudi et al. 2022), fine-tuned avoidance responses are  
48 less likely, as individuals may have no prior experience of cues that indicate infection (Weinstein et al.  
49 2018; Stockmaier et al. 2021). Spreading through host-host contacts, pathogens causing chronic infec-  
50 tions (Bastos et al. 2000; Vosloo et al. 2009; Jolles et al. 2021) may instead impose fitness costs, thus  
51 selecting against host social behaviour, and hence against social connectivity itself (Altizer et al. 2003;  
52 Cantor et al. 2021; Poulin and Fillion 2021; Romano et al. 2021; Ashby and Farine 2022).

53 Yet novel pathogen introductions are primarily studied for their immediate demographic (Fey et al.  
54 2015), and potential medical (Levi et al. 2012; Chandler et al. 2021; Kuchipudi et al. 2022; Wille and

55 Barr 2022) and economic implications (Keeling et al. 2001; Goulson et al. 2015; Jolles et al. 2021), with  
56 host evolutionary dynamics (and especially changes in sociality) mostly ignored. This is presumably be-  
57 cause the evolution of pathogen host traits, and moreover complex behavioural traits such as sociality, is  
58 expected to be slow and not immediately relevant. Since important aspects of animal ecology, including  
59 the transmission of foraging tactics (Klump et al. 2021) and migration routes (Guttal and Couzin 2010;  
60 Jesmer et al. 2018), depend on social interactions, it is necessary to understand the long-term conse-  
61 quences of pathogen introductions for animal societies. Climate change is only expected to make novel  
62 pathogen introductions more common (Sanderson and Alexander 2020; Carlson et al. 2022), making  
63 such studies more urgent.

64 Theory suggests that animal sociality evolves to balance the value of social associations against the  
65 risk of pathogen transmission (Bonds et al. 2005; Prado et al. 2009; Ashby and Farine 2022). How-  
66 ever, analytical models often reduce animal sociality to single parameters, while it actually emerges  
67 from individual decisions conditioned on multiple internal and external cues. Social decision-making  
68 and movement often also vary among individuals (Tanner and Jackson 2012; Wolf and Weissing 2012;  
69 Spiegel et al. 2017; Gartland et al. 2021), but analytical models are unable to include individual dif-  
70 ferences in sociability. Epidemiological models based on contact networks can incorporate individual  
71 variation in social behaviour by linking these differences to positions in a social network (White et al.  
72 2017; Albery et al. 2020; 2021). Yet network models often cannot capture fine-scale feedbacks between  
73 individuals' social and spatial positions (Albery et al. 2020; 2021), nor spatial variation in infection risk  
74 (Albery et al. 2022), making such models sensitive to both the network formation process, and to sam-  
75 pling biases in empirical data collection (White et al. 2017).

76 Mechanistic, individual-based simulation models (IBMs) suggest themselves as a natural solution;  
77 they can incorporate substantial ecological detail, including explicit spatial settings (DeAngelis and  
78 Diaz 2019), and detailed disease transmission (White et al. 2018*a,b*; Scherer et al. 2020; Lunn et al.  
79 2021). Individual-based models hitherto have focused on immediate epidemiological outcomes, such  
80 as infection persistence, and do not have an evolutionary component (White et al. 2018*b*; Scherer et al.  
81 2020; Lunn et al. 2021). Incorporating an evolutionary component to movement-disease IBMs could  
82 allow predictions on important feedbacks between the ecological outcomes of infectious disease and the  
83 consequences for the evolution of host behaviour (Cantor et al. 2021). This could include the emergence  
84 of tradeoffs in the costs and benefits of sociability (Gartland et al. 2021), with cascading ecological and  
85 social effects (Tanner and Jackson 2012; Spiegel et al. 2017; Monk et al. 2022; Webber et al. 2022). The  
86 range of animal taxa at risk from a wide array of pathogens and parasites (Sanderson and Alexander  
87 2020; Carlson et al. 2022) makes it important to conceive of models that can capture the key features of  
88 diverse host-pathogen dynamics and offer broad conceptual insights (White et al. 2018*a,b*).

89 We built a model that seeks to capture the essential elements of pathogen (or parasite) transmission  
90 among animals foraging on patchily distributed resources — this is a common behavioural context

91 shared by many potential host species (White et al. 2018a,b). We examined the eco-evolutionary con-  
92 sequences of the introduction of a pathogen into a novel host population (such as during cross-species  
93 spillover: Bastos et al. 2000; Blehert et al. 2009; Fereidouni et al. 2019; Scheele et al. 2019; Sanderson and  
94 Alexander 2020; Carlson et al. 2022; Kuchipudi et al. 2022; Monk et al. 2022; Wille and Barr 2022). In  
95 our evolutionary, spatial, individual-based simulation, we modelled the repeated introduction of an in-  
96 fectious pathogen to populations that had already evolved foraging movement strategies in its absence.  
97 Our model could be conceived as an abstract representation of, among others, spillovers of foot-and-  
98 mouth disease from buffalo to impala (Bastos et al. 2000; Vosloo et al. 2009), or sarcoptic mange from  
99 llamas to vicuñas (Monk et al. 2022), current and historic spread of avian influenza among sea- and  
100 wading bird species (H5N8 and Related Influenza Viruses 2016; Wille and Barr 2022), or SARS-CoV-2  
101 from humans to deer (Chandler et al. 2021; Kuchipudi et al. 2022).

102 We compared how social information was used in movement strategies evolved before and after  
103 pathogen introduction, and the ecological outcomes for individual intake, movement, and associations  
104 with other foragers. Using both IBMs and network epidemiological models (Bailey 1975; White et al.  
105 2017; Stroeymeyt et al. 2018; Wilber et al. 2022), we examined whether pathogen-risk adapted popula-  
106 tions were more resilient to the spread of infectious disease than their pathogen-risk naive ancestors.  
107 We also investigated the effect of landscape productivity and the cost of infection, which are both ex-  
108 pected to influence the selection imposed by pathogen transmission (Hutchings et al. 2000; Almberg  
109 et al. 2015; Ezenwa et al. 2016). Overall, we provide a theoretical framework broadly applicable to novel  
110 host-pathogen introduction scenarios, and demonstrate the importance of including evolutionary dy-  
111 namics in movement-disease models.

112

## Methods

113 We implemented an individual-based simulation model to represent foraging animals ('foragers') seek-  
114 ing discrete, immobile, depleteable food items (see *SI Appendix Fig. S1 – S2*) (Spiegel et al. 2017; Gupte  
115 et al. 2021). Food items are distributed over a two-dimensional, continuous-space resource landscape  
116 with wrapped boundaries (a torus). Our model, similar to previous eco-evolutionary individual based  
117 models (Getz et al. 2015; Gupte et al. 2021; Netz et al. 2021), has two distinct timescales: (1) an eco-  
118 logical timescale comprising of  $T$  timesteps that make up one generation ( $T = 100$  by default), and (2)  
119 an evolutionary timescale consisting of 5,000 generations ( $G$ ). At the ecological timescale, individuals  
120 sense local counts of food items and competitors, move according to inherited movement strategies, and  
121 forage for food. At the same timescale, individuals that carry an infectious, fitness-reducing pathogen,  
122 may, when in close proximity with uninfected individuals, pass on the pathogen with a small prob-  
123 ability (see *Pathogen Transmission and Disease Cost*). At the evolutionary timescale, individuals re-  
124 produce and transmit their movement strategies (see *Starting Location and Inheritance of Movement*

125 *Rules*) to their offspring. The number of offspring is linked both to individuals' success in finding  
126 and consuming food items, and to the duration that they were infected by the pathogen at the eco-  
127 logical timescale. The model was implemented in R and C++ using Rcpp (Eddelbuettel 2013; R Core  
128 Team 2020) and the *Boost.Geometry* library for spatial computations ([www.boost.org](http://www.boost.org)); model code is at  
129 [github.com/pratikunterwegs/pathomove](https://github.com/pratikunterwegs/pathomove).

## 130 *Distribution of Food Items*

131 Our landscape of  $60 \times 60$  units contains 1,800 discrete food items, which are clustered around 60 re-  
132 source 'kernels', for a resource density of 0.5 items per unit<sup>2</sup> (see *SI Appendix Fig. S1 – S2*). This prevents  
133 synchronicity in the availability and regeneration of food items. Each available food item can be sensed  
134 and harvested by foraging individuals (see below). Once harvested, another food item is regenerated at  
135 the same location after a fixed regeneration time  $R$ , which is set at 50 timesteps by default; alternative  
136 values of 20 and 100 timesteps represent high and low productivity landscapes respectively. Food item  
137 regeneration is delinked from population generations. Thus the actual number of available food items  
138 is almost always in flux. In our figures and hereafter, we chose to represent  $R$  as the number of times a  
139 food item would regenerate within the timesteps in a single generation  $T$  (default = 100), resulting in  
140  $R$  values of 1, 2, and 5 for regeneration times of 100, 50 (the default), and 20 timesteps. Items that are  
141 not harvested remain on the landscape until they are picked up by a forager. Each food item must be  
142 processed, or 'handled', by a forager for  $T_H$  timesteps (the handling time, default = 5 timesteps) before  
143 it can be consumed (Ruxton et al. 1992; Gupte et al. 2021). The handling time dynamic is well known  
144 from natural systems in which there is a lag between finding and consuming a food item (Ruxton et al.  
145 1992).

## 146 *Individual Foraging and Movement*

147 *Foraging.* Individuals forage in a randomised order, harvesting the first available food item within  
148 their movement and sensory range ( $d_S = d_M$ , a circle with a radius of 1 unit (see *SI Appendix Fig.*  
149 *S1 – S2*). Once harvested, the item is no longer available to other individuals, leading to exploitation  
150 competition among nearby foragers. Furthermore, the location of the item also yields no more cues to  
151 other foragers that an item will reappear there, reducing direct cues by which foragers can navigate to  
152 profitable clusters of food items. Individuals that harvest a food item must handle it for  $T_H$  timesteps  
153 (default = 5 timesteps), while all individuals not handling a food item are considered idle (Ruxton et  
154 al. 1992; Gupte et al. 2021). As handlers are immobilised at the location where they encountered food,  
155 they may be good indirect indicators of the location of a resource cluster ('social information') (Danchin  
156 et al. 2004; Romano et al. 2020; Gupte et al. 2021). Once individuals finish handling a food item, they

157 return to the non-handling, searching state.

158 *Movement.* Our model individuals move in small, discrete steps of fixed size ( $d_M = 1$  unit). Each step  
159 is chosen based on the individuals' assessment of local environmental cues, and this assessment is made  
160 using evolved movement strategies (as in Gupte et al. 2021; Netz et al. 2021). First, individuals scan their  
161 current location, and five equally spaced points around their position, at a distance of 1 unit for three  
162 cues ( $d_S$ , see *SI Appendix Fig. S1 – S2*): the number of food items ( $F$ ), the number of foragers handling  
163 a food item ('handlers':  $H$ ) and the number of idle foragers not handling a food item ('non-handlers':  
164  $N$ ). Individuals assign a suitability (see Gupte et al. 2021; Netz et al. 2021) to their current position and  
165 each of the five locations, using their inherited preferences for each of the cues:  $S = s_F F + s_H H + s_N N$   
166  $+ \epsilon$ . The preferences  $s_F$ ,  $s_H$ , and  $s_N$  for each of the three cues are heritable from parents to offspring,  
167 while  $\epsilon$  is a very small error term drawn for each location, to break ties among locations. The values of  
168 each of the cue preferences *relative to each other* determine individuals' movement strategies (Gupte et  
169 al. 2021). All individuals move simultaneously to the location to which they have assigned the highest  
170 suitability ('step selection') (akin to step-selection; Fortin et al. 2005); this may be their current location,  
171 in which case individuals are stationary for that timestep. Since individuals may differ in their inherited  
172 preferences for each of the three cues, two individuals at the same location may make quite different  
173 movement decisions based on the same local cues. Handlers, however, are considered immobile and  
174 do not make any movement decisions.

## 175 *Pathogen Transmission and Disease Cost*

176 We modelled circumstances that are expected to become increasingly common due to rapid global  
177 changes; the population evolves for  $3/5^{\text{th}}$  of the simulation (until  $G = 3,000$ ; of 5,000) in the absence of  
178 a pathogen, after which a pathogen is introduced in each generation until the end of the simulation ( $G$   
179  $= 5,000$ ). Our model captures some essential features of pathogen or parasite transmission among ani-  
180 mals (White et al. 2017): the pathogen may transmit from infected host individuals to their susceptible  
181 neighbours with a per-timestep probability  $p$  of 0.05. This transmission is only possible when the two  
182 individuals are within a the transmission distance,  $d_\beta$ . For simplicity, we set  $d_\beta$  to be the movement  
183 range (1 unit). Once transmitted, the pathogen is assumed to cause a chronic disease which reduces  
184 host energy stores by a fixed amount called  $\delta E$  in every following timestep;  $\delta E$  is set to 0.25 by default  
185 (alternative values: 0.1, 0.5). Since novel pathogen introductions can periodically re-occur in natural  
186 environments (Bastos et al. 2000; Vosloo et al. 2009; Almberg et al. 2015; Goulson et al. 2015; Jolles  
187 et al. 2021; Carlson et al. 2022; Wille and Barr 2022), we set up our model such that the pathogen was  
188 introduced to 4% of individuals in each generation ( $N = 20$ ; 'primary infections'). This is necessary to  
189 kick-start the pathogen-movement eco-evolutionary feedback dynamics, and populations may indeed  
190 repeatedly acquire novel pathogens (or strains) through external sources, such as infected individuals

191 of other spatially overlapping species (e.g. Bastos et al. 2000; Keeling et al. 2001; Vosloo et al. 2009;  
192 Chandler et al. 2021; Carlson et al. 2022; Kuchipudi et al. 2022; Monk et al. 2022; Wille and Barr 2022).  
193 For completeness, we also considered scenarios in which novel pathogen introductions only occur spo-  
194 radically in the generations after the initial event, rather than in every generation (see *SI Appendix*).

## 195 *Starting Location and Inheritance of Movement Rules*

196 For simplicity, we considered a population of haploid individuals with discrete, non-overlapping gen-  
197 erations, and asexual inheritance. At the end of the parental generation, the net lifetime energy of  
198 each individual was determined as the difference of the total energy gained through food intake and  
199 the energy lost through infection. In the *SI Appendix*, we also consider an alternative implementation  
200 in which potential immune resistance against the pathogen requires a certain percentage of individual  
201 intake, reducing the value of each food item. The parental population produces an offspring population  
202 (of the same size) as follows: to each offspring, a parent is assigned at random by a weighted lottery,  
203 with weights proportional to lifetime net energy (an algorithm following the replicator equation) (Hof-  
204 bauer and Sigmund 1988; Hamblin 2013). This way, the expected number of offspring produced by a  
205 parent is proportional to the parent's lifetime success (Hofbauer and Sigmund 1988). The movement  
206 decision-making cue preferences  $s_F$ ,  $s_H$ , and  $s_N$  are subject to independent random mutations with a  
207 probability of 0.01. The mutational step size (either positive or negative) is drawn from a Cauchy dis-  
208 tribution with a scale of 0.01 centred on zero. Thus, while the majority of mutations are small, there  
209 can be a small number of very large mutations. As in real ecological systems, individuals in the new  
210 generation are initialised around the location of their parent (within a standard deviation of 2.0), and  
211 thus successful parents give rise to local clusters of offspring (see an alternative implementation in *SI*  
212 *Appendix*).

## 213 *Model Output*

214 *Social Information Use.* To understand the evolution of movement strategies, and especially how indi-  
215 viduals weighed social information, we recorded the population's evolved cue preferences in every sec-  
216 ond generation, and interpreted them using the 'behavioural hypervolume' approach (Bastille-Rousseau  
217 and Wittemyer 2019). We classified individuals based on how they used social information — the  
218 presence and status of competing foragers — into four social movement classes: (1) agent avoiding,  
219 if  $s_H, s_N < 0$ , (2) agent tracking, if both  $s_H, s_N > 0$ , (3) handler tracking, if  $s_H > 0, s_N < 0$ , and (4)  
220 non-handler tracking, if  $s_H < 0, s_N > 0$ . We calculated the relative importance of social cues —  $H, N$  —  
221 to each individual's movement strategy as  $SI_{imp} = (|s_H| + |s_N|) / (|s_H| + |s_N| + |s_F|)$ , with higher values  
222 indicating a greater importance of social cues.



223 *Proximity-Based Social Network.* We created a proximity-based adjacency matrix by counting the num-  
224 ber of times each individual was within the sensory and pathogen transmission distance  $d_\beta$  ( $= d_S, d_M$   
225  $= 1$  unit) of another individual (Whitehead 2008; Wilber et al. 2022). We transformed this matrix into  
226 an undirected social network weighted by the number of pairwise encounters: in a pairwise encounter,  
227 both individuals were considered to have associated with each other (White et al. 2017). The strength  
228 of the connection between any pair was the number of times the pair were within  $d_\beta$  of each other over  
229 their lifetime. We logged encounters and constructed social networks after every 10% of the total gener-  
230 ations (i.e., every 500<sup>th</sup> generation), and at the end of the simulation, and omitted ephemeral pairwise  
231 associations with a weight  $< 5$ .

## 232 *Model Analysis*

233 We plotted the mix of social information-based movement strategies evolved across generations in each  
234 parameter combination. Focusing on our default scenario ( $\delta E = 0.25, R = 2$ ), we visualised the mean  
235 per-capita distance moved, mean per-capita intake, and mean per-capita encounters with other for-  
236 agers. We examined how the three main social movement strategies — agent avoidance, agent track-  
237 ing, and handler tracking — changed in frequency over generations. We also examined differences  
238 among strategies in the movement distance, associations with other agents, and frequency of infection,  
239 after they had reached an eco-evolutionary equilibrium following pathogen introduction ( $G > 3,500$ ).  
240 We visualised the proximity based social networks of populations in a representative scenario ( $\delta E =$   
241  $0.25, R = 2$ ), focusing on the generations just before and after the pathogen introduction events begin  
242 (pre-introduction:  $G = 3,000$ ; post-introduction:  $G = 3,500$ ). We plotted the numbers of individuals  
243 infected in each generation after pathogen introduction to examine whether evolutionary changes in  
244 movement strategies actually reduced infection spread. We also ran simple network epidemiological  
245 models on the emergent individual networks in generations 3,000 and 3,500 (Bailey 1975; White et al.  
246 2017; Stroeymeyt et al. 2018; Wilber et al. 2022), for robust comparisons of potential pathogen spread  
247 in pathogen-risk naive and pathogen-risk adapted populations, respectively.

## 248 *Data and Code Availability*

249 The *Pathomove* simulation model code is available on Zenodo at <https://zenodo.org/record/6782640>,  
250 and on Github at [github.com/pratikunterwegs/pathomove](https://github.com/pratikunterwegs/pathomove). Code to run the simulations and analyse the  
251 output is on Zenodo at <https://zenodo.org/record/6782665>, and on Github at: [github.com/pratikunterwegs/patho-](https://github.com/pratikunterwegs/pathomove-evol)  
252 [move-evol](https://github.com/pratikunterwegs/pathomove-evol).

## Results

253

254 In our model, individuals move and forage on a landscape with patchily distributed food items, and se-  
255 lect where next to move in their vicinity, based on inherited preferences for environmental cues — food  
256 items, and other individuals (see *SI Appendix Fig. S1*). Food items, once consumed, regenerate at a rate  
257  $R$ , and pathogen infection imposes a per-timestep cost  $\delta E$ . We classified individuals' social movement  
258 strategies in our model using a simplified 'behavioural hypervolume' approach (Bastille-Rousseau and  
259 Wittemyer 2019), based on the sign of their preferences for successful foragers handling a food item  
260 ('handlers', preference  $s_H$ ), and for unsuccessful foragers still searching for food ('non-handlers', pref-  
261 erence  $s_N$ ). In our default scenario,  $R = 2$ , food regenerates twice per generation, and  $\delta E = 0.25$ , i.e.,  
262 consuming 1 food item offsets 4 timesteps of infection. Over the 3,000 generations before the intro-  
263 duction of the pathogen, populations reached an eco-evolutionary equilibrium where the commonest  
264 social movement strategy was to prefer moving towards both handlers and non-handlers ('agent track-  
265 ing';  $s_H, s_N > 0$ ; but see below) (Fig. 1A).

### *Rapid Evolutionary Shift in Social Movement Strategies Following Pathogen*

266

#### *Introduction*

267

268 Introducing an infectious pathogen to 4% ( $n = 20$ ) of individuals in each generation (after  $G = 3,000$ ),  
269 leads to a remarkably rapid evolutionary shift — within only 25 generations of pathogen introduction  
270 — in how social information is incorporated into individuals' movement strategies. There is a marked  
271 increase in the frequency of individuals that track successful foragers, but avoid non-handlers ('handler  
272 tracking';  $s_H > 0$ , but  $s_N < 0$ ) (Fig. 1A;  $3,000 < G < 3,025$ ). Surprisingly, after a brief period (in  
273 evolutionary terms) of handler tracking being the most common strategy, a third strategy also becomes  
274 more common: avoiding both handlers and non-handlers ('agent avoiding';  $s_H, s_N < 0$ ). Within 250  
275 generations after pathogen introduction, agent avoiding becomes as common as the handler tracking  
276 strategy, and this appears to be a stable equilibrium that is maintained until the end of the simulation  
277 (2,000 generations after pathogen introduction; Fig. 1A). The *SI Appendix* shows how the occurrence  
278 of rapid evolutionary shifts is broadly robust to modelling assumptions; in brief, such shifts occur even  
279 when individuals cannot benefit from evolved adaptation to local conditions (Badyaev and Uller 2009),  
280 and when the pathogen saps a percentage, rather than an absolute value, from daily intake.

281 In addition to qualitative changes in social movement strategies, pathogen introduction also leads  
282 to social information becoming more important to movement decisions. Prior to pathogen introduc-  
283 tion ( $G < 3,000$ ), individuals' handler- and non-handler preferences ( $|s_H| + |s_N|$ ; taken together, social  
284 information) barely influence their movement strategies (Fig. 1B). These are instead guided primar-  
285 ily by the preference for food items ( $s_F$ ; see *Model and Analysis*; see also *Supplementary Material Fig.*

286 1). Social movement decisions are joint outcomes of individual preferences for social cues and the cue  
287 value: consequently, in clustered populations (see below), even small positive values of  $s_H$  and  $s_N$  lead  
288 to strong emergent sociality. After pathogen introduction, there is a substantial increase in the average  
289 importance of individuals' preferences (or aversions) for the presence of other foragers (Fig. 1B). How-  
290 ever, there is significant variation among individuals in the importance of social information to their  
291 movement strategies, with distinct evolved polymorphisms that vary substantially between simulation  
292 replicates (Fig. 1B).

### 293 *Disease-dominated Ecological Cascade Due to Evolutionary Shift in Movement* 294 *Strategies*

295 The evolutionary shift in social movement strategies causes a drastic change in ecological outcomes  
296 (Fig. 1C – E; see *SI Appendix Fig. S3* for other scenarios). There is a sharp increase in mean distance  
297 moved by individuals; while pre-introduction individuals moved 35% of their lifetimes on average (i.e.,  
298 35 timesteps; handling for the remainder), post-introduction, individuals move for 80% of their life-  
299 times (i.e., 80 timesteps; Fig. 1C). The handler tracking and agent avoiding strategies lead individuals  
300 to move away from groups of individuals ('dynamic social distancing'; Pusceddu et al. 2021). Individu-  
301 als being most likely to be found near resource clusters, this leads to movement away from productive  
302 areas of the landscape. Consequently, there is a rapid, four-fold drop in mean per-capita intake after  
303 pathogen introduction (Fig. 1D). The concurrent, near 100-fold drop in encounters between individu-  
304 als after pathogen introduction (Fig. 1E) suggests that most encounters were likely taking place on or  
305 near resource clusters. The reductions in intake observed are equivalent to those expected from halv-  
306 ing landscape productivity (*SI Appendix Fig. S3*). Our model shows how even a non-fatal pathogen, by  
307 influencing the evolution of movement strategies, can have substantial indirect ecological effects — a  
308 disease dominated ecological cascade (Monk et al. 2022).

### 309 *Co-existence of Social Movement Strategies*

310 At eco-evolutionary equilibrium ( $G > 3,500$ ) the relationship between movement and avoiding associ-  
311 ations (and further, infection) is mediated by individual differences in how exactly social information  
312 is incorporated into movement strategies. Individuals using the agent avoiding strategy move more  
313 than handler tracking ones (Fig. 2A), about 85% of their lifetime (default scenario:  $R = 2$ ;  $\delta E = 0.25$ ).  
314 At this limit, every step moved allows them to avoid approximately 2 encounters with other individu-  
315 als. Handler tracking individuals move much less ( $\sim 60\% - 80\%$ ), but are able to avoid approximately  
316 20 encounters with other individuals with every extra step. These differences may explain why agent  
317 avoiding and handler tracking individuals have similar mean infection rates, at  $\sim 25\%$  and  $\sim 33\%$  respec-

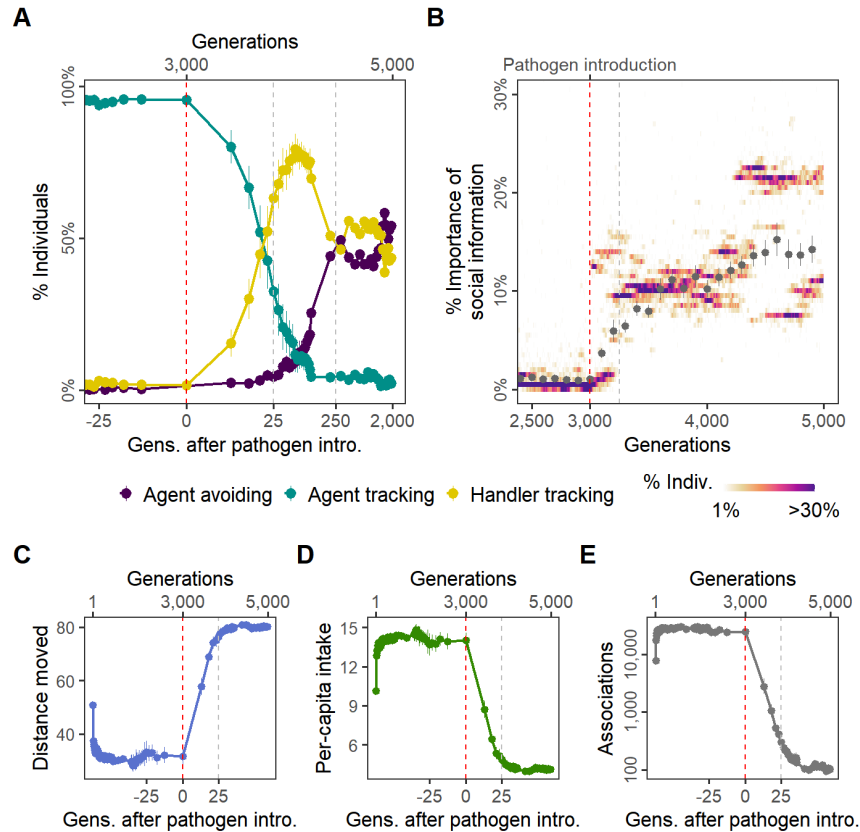

**Figure 1: Pathogen introduction leads to rapid evolutionary changes in social information use, with cascading effects on population ecological outcomes. (A)**

Before pathogen introduction in the default scenario ( $R = 2$ ,  $\delta E = 0.25$ ), populations rapidly evolve a social movement strategy that tracks all other individuals (‘agent tracking’;  $G \leq 3,000$ ) — however, their overall movement strategy is primarily guided by the presence of food items (B). Pathogen introduction leads to the rapid replacement, within 25 generations, of agent tracking with ‘handler tracking’ (preference for successful foragers;  $3,000 < G < 3,025$ ). Within 250 generations, ‘agent avoidance’ (avoidance of both successful and unsuccessful foragers;  $G > 3,250$ ) also becomes common, stably co-existing with the handler tracking strategy in an eco-evolutionary equilibrium. (B) After pathogen introduction ( $G > 3,000$ ), the importance of social cues (the presence of other individuals; the sum of the absolute, normalised preferences  $sH$ ,  $sN$ ) increases substantially on average (grey points). Additionally, there is significant variation in the importance of social cues to individuals (shaded regions), which is not captured by the mean or standard error. At  $G = 4,500$ , for example, social information comprises  $\approx 10\%$  of some individuals’ movement strategies, but some individuals have evolved a stronger weight for social cues ( $> 20\%$ ). The rapid change in social movement strategies following pathogen introduction has cascading effects on ecological outcomes. Individuals, which have evolved strong aversions to at least some kinds of foragers (depending on their strategy), (C) move more on average, (D) have only 25% of the pre-pathogen average intake, and (E) have 100-fold fewer associations with other individuals. All panels show data averaged over 10 replicates, but shaded region in panel B shows only a single replicate for clarity.

318 tively (Fig. 2B). All other strategies, especially the agent tracking strategy common in pre-introduction  
319 populations, are barely able to translate increased movement into fewer associations (Fig. 2A). These  
320 strategies have a wide range of infection rates (Fig. 2B), potentially because they are very rare — these  
321 likely represent mutants that do not give rise to persistent lineages.

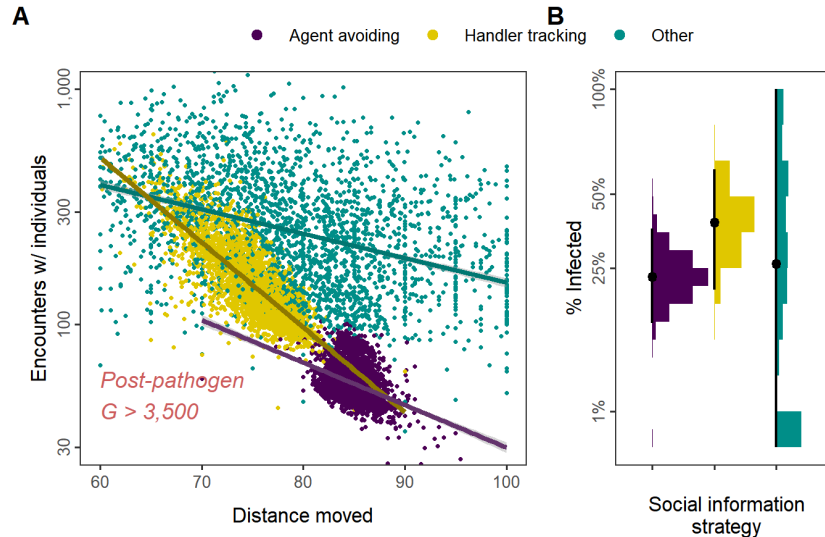

**Figure 2: Social movement strategies trade movement for associations through dynamic social distancing, leading to differences in infection rates.** In post-introduction populations at eco-evolutionary equilibrium ( $G > 3,500$ ), (A) both agent avoiding and handler tracking individuals can reduce encounters with other individuals by moving to avoid other foragers (dynamic social distancing). Handler tracking individuals have many more encounters than agent avoiding individuals, but surprisingly, are better able to reduce encounters through increased movement. Individuals using other strategies (mostly agent tracking) have a wider range of movement distances, but cannot efficiently avoid other foragers by moving more. (B) Avoiding all other foragers leads to marginally lower infection rates than tracking successful foragers (and avoiding unsuccessful ones; handler tracking). Surprisingly, rare pre-introduction strategies such as following any nearby individuals (agent tracking) may also have low infection rates, potentially due to their rarity. Panel A shows linear model fits with a log scale Y-axis; panel B shows infection rates; all data represent generation- and replicate-specific means ( $G > 3,500$ ;  $R = 2$ ,  $\delta E = 0.25$ ).

322

### *Reorganisation of Spatial-social Structure*

323 Following pathogen introduction, the mixture of individual-level movement strategies elicits a substan-  
324 tial re-organisation of emergent spatial and social structure at the population level. Pre-introduction  
325 populations are strongly clustered in space (Fig. 3A), due to movement strategies that favour following  
326 most other foragers. This spatial proximity means that most individuals encounter each other at least  
327 once, leading to numerous unique partners (the ‘degree’) for each forager (Fig. 3 inset 1: blue). In con-

328 trast, the spread-out networks in pathogen-risk adapted populations suggest that most foragers move  
329 substantially from their initial locations over their lifetime, associating only ephemerally with foragers  
330 from all over the landscape (Fig. 3B). This reflects movement strategies which lead to near-perpetual  
331 movement to avoid associations; a sort of dynamic social distancing seen in real animal societies under  
332 risk of pathogen spread (Stroeymeyt et al. 2018; Weinstein et al. 2018; Pusceddu et al. 2021; Stockmaier  
333 et al. 2021). This dispersed population structure means that most pathogen-risk adapted foragers en-  
334 counter fewer than 10% of the population over their lifetime (Fig. 3 inset 1: red).

### 335 *Pathogen-risk adapted Movement Strategies Make Animal Societies More* 336 *Resilient to the Spread of Disease*

337 Nearly every individual in the generations just after pathogen introduction was infected. However,  
338 tracking the evolutionary change in movement strategies, the number of infected individuals fell to just  
339 about 50% within 25 generations (Fig. 3C). To examine potential pathogen spread in pre-introduction  
340 populations, we ran a simple epidemiological model on the social networks emerging from individuals'  
341 movements before and after pathogen introduction (pre-introduction:  $G = 3,000$ ; post-introduction:  $G$   
342  $= 3,500$ ). We modelled two diseases, (i) first, a disease requiring one encounter, and (ii) second, a disease  
343 requiring ten encounters between individuals for a potential transmission event (transmission rate  $\beta =$   
344  $5.0$ , recovery rate  $\gamma = 1.0$ ).

345 Both the single encounter and multiple encounter diseases would infect 75% – 80% of individuals  
346 when spreading through the networks of pre-introduction populations (Fig. 3D) pathogen-risk adapted  
347 populations' social networks are more resilient to both the single encounter and multiple encounter  
348 disease, compared to their pre-introduction, pathogen-risk naive ancestors (Fig. 3D), as these social  
349 networks are sparser and individuals are more weakly connected (Fig. 3D; see Fig. 3D). Less than 60%  
350 of post-introduction populations were finally infected by the single encounter disease, compared with  
351  $> 75\%$  of pre-introduction, pathogen-risk naive ancestors; in pathogen-risk adapted populations, the  
352 spread of the multiple encounter disease was even slower (ever infected:  $\approx 20\%$ ).

### 353 *Usefulness of Social Information and Infection Cost Influence Evolution of* 354 *Social Movement Strategies*

355 We further explored the effect of two ecological parameters, landscape productivity ( $R \in 1, 2, 5$ ) and  
356 infection cost per timestep ( $\delta E \in 0.1, 0.25, 0.5$ ) on simulation outcomes. Before pathogen introduction,  
357 landscape productivity alone determines the value of social information, and thus which social move-  
358 ment strategies evolve (Fig. 4). On low-productivity landscapes ( $R = 1$ ), social information is valuable

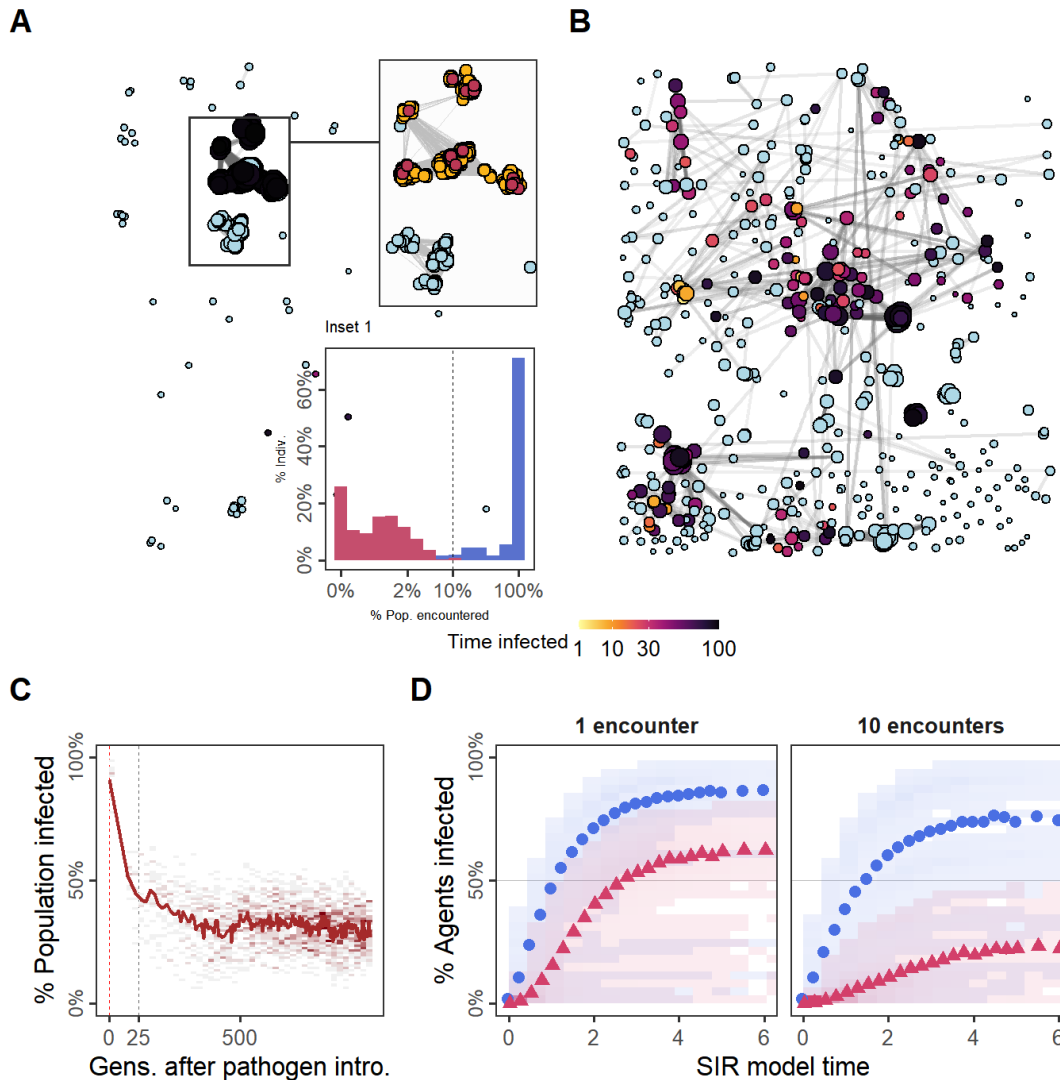

**Figure 3: Reduced spatial-social clustering and disease transmission in populations adapted to the presence of an infectious pathogen.** pathogen-risk naive populations (**A**;  $G = 3,000$ ) are much more spatially clustered than pathogen-risk adapted populations (**B**;  $G = 3,500$ ), and are thus rapidly infected (red: primary infections; yellow: secondary infections; blue: never infected). Pre-introduction individuals encounter many more unique neighbours (**inset 1**, blue) than pathogen-risk adapted individuals (**inset 1**; red). Dashed grey line represents 10% of individuals encountered ( $N = 50$ ). Main panels show social networks from a single replicate of the default scenario ( $R = 2$ ,  $\delta E = 0.25$ ), insets show 10 replicates. Nodes represent individuals positioned at their final location. Connections represent pairwise encounters, and node size represents encounters (larger = more encounters). Darker node colours indicate longer infection (light blue = no infection). **(C)** In the first generations following pathogen introduction, nearly every single individual in the population is infected. However, within 25 generations, tracking the evolutionary shift towards movement strategies that avoid some or all other individuals, only about 50% of individuals are ever infected; this drops to a stable 30% within 500 generations after pathogen introduction. **(D)** The progression of two hypothetical diseases, requiring a single encounter, or 10 encounters for a potential transmission, on emergent social networks. The transmission of both diseases is reduced in populations with disease-adapted movement strategies (pre-introduction:  $G = 3,000$ , blue circles; post-introduction:  $G = 3,500$ , red triangles). Subfigures in panel D show means of 25 SIR model replicates (transmission rate  $\beta = 5.0$ , recovery rate  $\gamma = 1.0$ ), run on emergent social network; both panels represent 10 simulation replicates the default scenario.

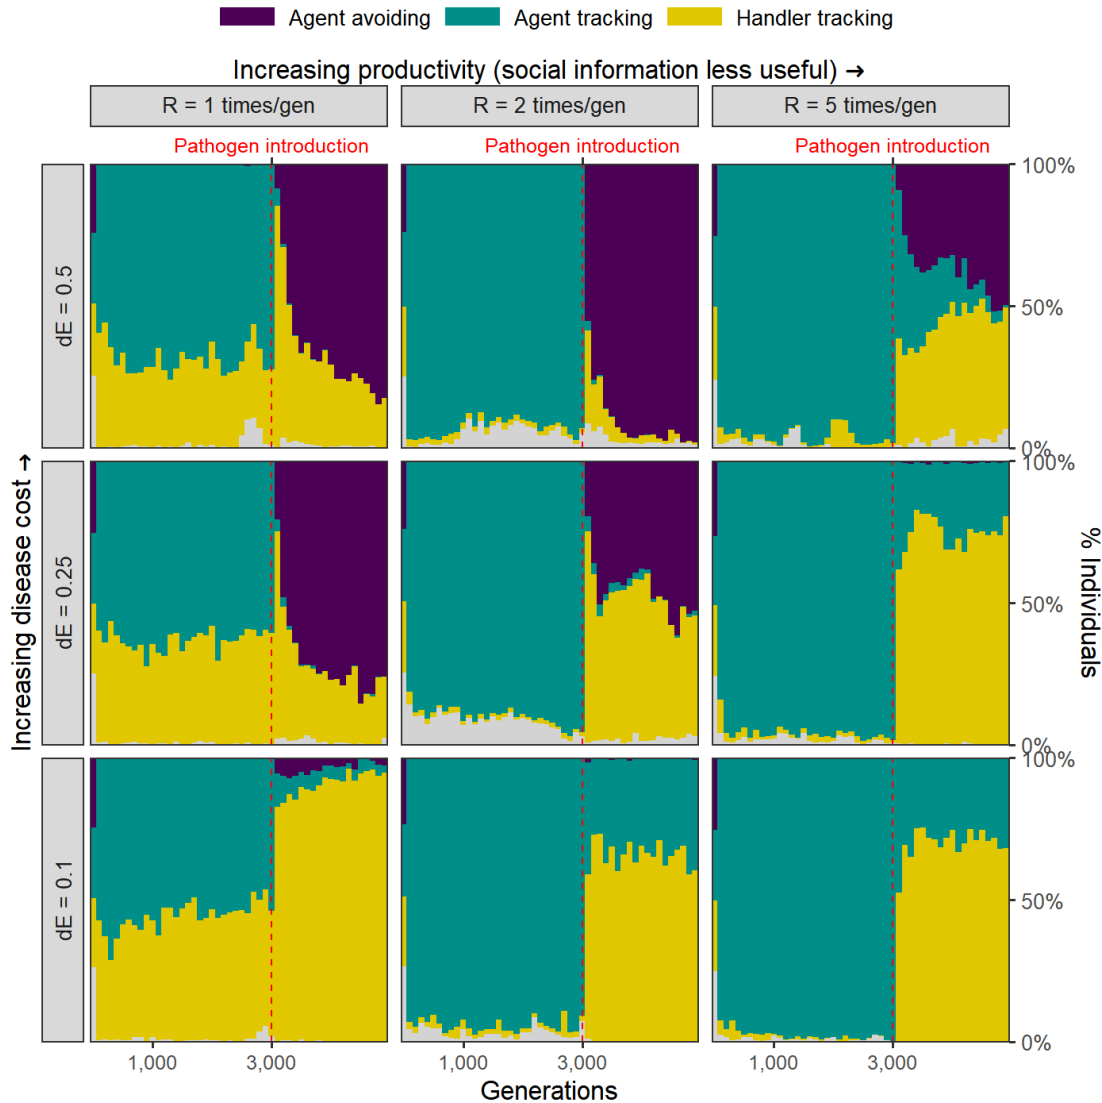

**Figure 4: The balance of infection cost and the usefulness of social information together shape the rapid evolutionary change in movement strategies triggered by pathogen introduction.**

Pre-introduction ( $G = 3,000$ ; dashed line) populations contain a mix of individuals that either track all foragers (agent tracking), or only successful foragers (handler tracking). Handler tracking is more common on low-productivity landscapes ( $R = 1$ ), where social information is more useful to find patchily distributed resources. After pathogen introduction, handler tracking rapidly becomes the most common strategy when the apparent usefulness of social information is greater than the cost of infection. This occurs both when productivity is low ( $R = 1$ ) and infection costs are low ( $\delta E = 0.1$ ), but also when productivity is high ( $R = 5$ ) with intermediate infection costs ( $\delta E = 0.25$ ). When the cost of infection outweighs the apparent usefulness of social information, the agent avoidance (avoiding both successful and unsuccessful foragers) emerges and rapidly becomes a common strategy ( $\delta E = 0.5$ ;  $\delta E = 0.25$ ,  $R = 1$ ). In scenarios of high landscape productivity combined with low infection costs (e.g.  $R = 5$ ,  $\delta E = 0.1$ ), the agent tracking strategy persists in a large proportion after pathogen introduction, as these individuals can balance disease costs with intake alone. All panels show mean frequencies over 10 replicate simulations in 100 generation bins; frequencies are stacked. Grey areas show the relatively uncommon ‘non-handler’ tracking strategy.



359 as direct resource cues are scarce; here, the handler-tracking strategy persists. On high-productivity  
360 landscapes ( $R \in 2, 5$ ), social information is less valuable as individuals can directly detect food items  
361 more often; here, the agent tracking strategy is most common. Across parameter combinations, the in-  
362 troduction of the infectious pathogen leads to a rapid evolutionary shift in social movement strategies.  
363 The benefits of social information, and infection cost jointly determine how pathogen introduction al-  
364 ters the mix of social movement strategies, but populations generally shift away from indiscriminate  
365 agent tracking, as that strategy is associated with higher infection risk (see Fig. 3A).

366 When the benefit of social information is equivalent to the cost of infection, the handler tracking  
367 strategy is common ( $R = 1, \delta E = 0.1$ ;  $R = 5, \delta E = 0.25$ ). When apparent social information bene-  
368 fits are lower than infection costs (e.g.  $\delta E = 0.5$ ), the agent avoiding strategy is common. The effect  
369 of landscape productivity in obviating a sensitivity to social information cues (especially, conspecific  
370 status) is also eroded by pathogen introduction. On high-productivity landscapes where individuals  
371 were indiscriminately social, ( $R \in 2, 5, \delta E = 0.1$ ), the handler tracking strategy becomes common, as  
372 individuals prioritise higher-quality social information (handlers, which indicate a resource cluster).  
373 However, high landscape productivity can also compensate for the cost of infection, as evidenced by  
374 the agent tracking strategy remaining prevalent: this is only possible if these individuals can consume  
375 sufficient resources to overcome disease costs.

## 376 Discussion

377 Our general model captures important features of infectious pathogen (or parasite) transmission among  
378 host animals in a (foraging) context that is relevant to most species. The combination of ecological, evo-  
379 lutionary, and epidemiological dynamics in a spatial setting is unprecedented for movement-disease  
380 models, and extends current understanding of animal spatial and social ecology (Kurvers et al. 2014;  
381 Webber and Vander Wal 2018; Romano et al. 2020; Albery et al. 2021; Romano et al. 2021; Webber  
382 et al. 2022). Presently, most movement-disease models are non-evolutionary (White et al. 2017; 2018b;  
383 Scherer et al. 2020; Lunn et al. 2021), presumably because evolution is expected to be too slow to impact  
384 epidemiological-ecological outcomes (Monk et al. 2022). We demonstrate the pitfalls of this assump-  
385 tion: evolutionary transitions in sociality occur over fewer generations than required for the develop-  
386 ment of key aspects of animal ecology, such as migration routes (Jesmer et al. 2018; Cantor et al. 2021).  
387 We also demonstrate the tension inherent to sociality under the risk of an infectious pathogen, in an ex-  
388 plicitly spatial context. Our work shows how qualitatively and quantitatively different social movement  
389 strategies — making different trade-offs between social information and infection risk — can co-exist  
390 in a single population (Wolf and Weissing 2012; Webber and Vander Wal 2018; Gartland et al. 2021;  
391 Webber et al. 2022).

392 Prior to pathogen introduction, the value of social information influenced which social movement

393 strategies were evolved. Individuals initialised ('born') near their parent's final location may benefit  
394 from 'ecological inheritance' (Badyaev and Uller 2009) of their parent's favourable position near re-  
395 source clusters (see *SI Appendix Fig. S2, S4*). Avoiding potential competitors (and kin) thus correlates  
396 with avoiding profitable areas, and this leads to the persistence of the indiscriminately social agent  
397 tracking strategy, despite the evident costs of exploitation competition. In an alternative implemen-  
398 tation with large-scale natal dispersal, handler tracking is the commonest strategy prior to pathogen  
399 introduction (see *SI Appendix*). Following pathogen introduction, the agent tracking strategy of our  
400 default scenario allows the disease to spread very easily among entire lineages of social individuals (see  
401 Fig. 3A) (Kurvers et al. 2014). This neatly demonstrates why the risk of infection or parasitism could be  
402 among the mechanisms underlying density dependence in natal dispersal decisions (Travis et al. 1999).

403 Following pathogen introduction, the evolutionary shift in social movement strategies is much more  
404 rapid than the timescales usually associated with the evolution of complex traits such as sociality (about  
405 25 generations). Avoiding potentially infectious individuals is a key component of navigating the 'land-  
406 scape of disgust' (Weinstein et al. 2018). Our results show that sensitivity to cues of high pathogen  
407 transmission risk can rapidly evolve following the introduction of a novel pathogen, with a complete  
408 replacement of the hitherto dominant social strategy. The emergence of qualitative individual variation  
409 in social movement strategies, and especially the trade-off between movement, associations, and infec-  
410 tion risk also demonstrates the evolution of 'sociability as a personality trait' (Gartland et al. 2021). We  
411 also find substantial individual variation in the quantitative importance of social cues overall, which  
412 is a key component of the evolution of large-scale collective behaviours, such as migration (Guttal and  
413 Couzin 2010). Our work suggests how, by leading to the necessary diversity in social movement strate-  
414 gies, a novel pathogen may actually lay the groundwork for the evolution of more complex collective  
415 behaviour. Nonetheless, the rapid decreases in social interactions should primarily prompt concern that  
416 the evolutionary consequences of pathogen introduction could slow the transmission of, and erode, an-  
417 imal culture (Cantor et al. 2021) — including foraging (Klump et al. 2021) and migration behaviours  
418 (Guttal and Couzin 2010; Jesmer et al. 2018).

419 In our model, landscape productivity ( $R$ ), is a proxy for the usefulness of sociality overall, as social  
420 information is less useful when direct resource cues are abundant (high  $R$ ). Social information bene-  
421 fits in disease models often have no mechanistic relationship with the subject of the information (e.g.  
422 food or predators) (Ashby and Farine 2022). In contrast, social information benefits in our model are  
423 emergent outcomes of animal movement and foraging behaviour. Our predictions may help explain  
424 intra- and inter-specific diversity in social systems across gradients of infection risk and the usefulness  
425 of social information (Altizer et al. 2003; Sah et al. 2018), and studies tracking social movements and po-  
426 tential for disease spread could form initial tests of our basic predictions (Wilber et al. 2022). While our  
427 individuals do not die, the evolved pathogen-risk adapted, dynamic social distancing strategies (Stock-  
428 maier et al. 2021) lead to a significant worsening (equivalent to a halving) of individuals' intake. In  
429 real systems, this could increase populations' susceptibility to extreme climate change related mortal-

430 ity events (Fey et al. 2015).

431 More positively, animals may be able to adapt relatively quickly to the spillover and eventual persis-  
432 tence of infectious pathogens, even when they cannot specifically detect and avoid infected individuals  
433 (Altizer et al. 2003; Stroeymeyt et al. 2018; Pusceddu et al. 2021; Stockmaier et al. 2021). While the most  
434 noticeable effect of pathogen outbreaks is mass mortality (Fey et al. 2015), even quite serious pathogens  
435 — Sarcoptic mange (Almberg et al. 2015), foot-and-mouth disease (Bastos et al. 2000; Vosloo et al. 2009;  
436 Jolles et al. 2021), SARS-CoV-2 (Chandler et al. 2021; Kuchipudi et al. 2022), and avian influenza (H5N8  
437 and Related Influenza Viruses 2016; Wille and Barr 2022) among others — appear to spread at sub-lethal  
438 levels for many years between lethal outbreaks. Our model shows how disease-dominated ecological  
439 cascades (Monk et al. 2022) could occur even without mortality effects, due to evolutionary shifts in  
440 sociality alone. The altered ecological state (here, less resource consumption, as in Monk et al. 2022)  
441 may be maintained long after — and indeed because — a population has adapted to be less social in  
442 the presence of a pathogen. Our work suggests that decreased sociality resulting from adaptation to  
443 a novel pathogen could slow the transmission of future novel pathogens. While decreased sociality  
444 could also reduce the prevalence of previously endemic pathogens adapted to a more social host, it may  
445 also degrade ‘social immunity’ through reduced sharing of beneficial commensal microbes, or of low,  
446 immunising doses of pathogens (Almberg et al. 2015; Ezenwa et al. 2016).

447 Our model results are contingent upon sustained introduction of the pathogen (or its novel strains)  
448 to host populations. More sporadic introductions (once every few generations) apparently do not cause  
449 evolutionary shifts in social movement (*SI Appendix*). Yet repeated pathogen and parasite introductions  
450 among susceptible populations appear to be quite common (Bastos et al. 2000; Vosloo et al. 2009; Levi et  
451 al. 2012; H5N8 and Related Influenza Viruses 2016; Scherer et al. 2020; Jolles et al. 2021; Wille and Barr  
452 2022). Such introductions are often detected only among easily observed groups such as birds (Wille  
453 and Barr 2022), or after evident mass mortality events (Fey et al. 2015; Fereidouni et al. 2019). Seasonal  
454 host-pathogen dynamics could and do keep pathogens circulating in reservoir hosts, with regular pulses  
455 in primary infections similar to our model (e.g. due to new calves in African buffalo hosting foot-and-  
456 mouth disease: Jolles et al. 2021, or winter peaks in mange among wolves: Almberg et al. 2015). Existing  
457 host-pathogen dynamics, and potential pathogen range expansions, could thus provide more frequent  
458 opportunities for novel transmissions to overlapping species than previously guessed. Our model shows  
459 how this provides a powerful selective force in favour of detecting and avoiding infection risk cues  
460 (Weinstein et al. 2018).

461 In order to be widely applicable to diverse novel host-pathogen introduction scenarios, our model  
462 is necessarily quite general. A wide diversity of pathogens and their dynamics remains to be accurately  
463 represented in individual-based models (White et al. 2017; 2018b; Scherer et al. 2020; Lunn et al. 2021).  
464 Our framework can be expanded and specifically tailored to real-world situations in which populations  
465 are repeatedly exposed to novel pathogens (or strains) (Bastos et al. 2000; Scherer et al. 2020; Chandler

466 et al. 2021; Jolles et al. 2021; Kuchipudi et al. 2022; Wille and Barr 2022). Such detailed implemen-  
467 tations could include aspects of the pathogen life-cycle (White et al. 2017; 2018a), account for social-  
468 ity as a counter to infection costs (Almberg et al. 2015; Ezenwa et al. 2016), or model host-pathogen  
469 sociality-virulence co-evolution (Bonds et al. 2005; Prado et al. 2009; Ashby and Farine 2022). Future  
470 work would ideally combine wildlife monitoring and movement tracking across gradients of pathogen  
471 prevalence, to detect novel cross-species spillovers (Chandler et al. 2021; Kuchipudi et al. 2022) and  
472 study the spatial and epidemiological consequences of animal movement strategies (Bastille-Rousseau  
473 and Wittemyer 2019; Monk et al. 2022; Wilber et al. 2022). Our model shows why it is important to con-  
474 sider evolutionary responses in movement-disease studies, and provides a general framework to further  
475 the integration of evolutionary approaches in wildlife spatial epidemiology.

476

### Acknowledgements

477 We thank Jan Kreider for helpful feedback on an early draft of the manuscript; and Thijs Janssen for  
478 help with the simulation model code. We thank the Center for Information Technology of the Univer-  
479 sity of Groningen for providing access to the *Peregrine* high performance computing cluster to run sim-  
480 ulations. P.R.G was supported by an Adaptive Life Programme grant made possible by the Groningen  
481 Institute for Evolutionary Life Sciences (GELIFES). J.G. was supported by a grant from the Netherlands  
482 Organization for Scientific Research (NWO-ALW; ALWOP.668). F.J.W. and P.R.G acknowledge funding  
483 from the European Research Council (ERC Advanced Grant No. 789240).

484

### References

- 485 Albery, G. F., Kirkpatrick, L., Firth, J. A., and Bansal, S. (2021), “Unifying spatial and social network  
486 analysis in disease ecology”, *Journal of Animal Ecology*, 90/1: 45–61.
- 487 Albery, G. F., Morris, A., Morris, S., Pemberton, J. M., Clutton-Brock, T. H., Nussey, D. H., and Firth,  
488 J. A. (2020), “Spatial point locations explain a range of social network positions in a wild ungulate”,  
489 *bioRxiv*: 2020.06.04.135467.
- 490 Albery, G. F., Sweeny, A. R., Becker, D. J., and Bansal, S. (2022), “Fine-scale spatial patterns of wildlife  
491 disease are common and understudied”, *Functional Ecology*, 36/1: 214–25.
- 492 Almberg, E. S., Cross, P. C., Dobson, A. P., Smith, D. W., Metz, M. C., Stahler, D. R., and Hudson, P. J.  
493 (2015), “Social living mitigates the costs of a chronic illness in a cooperative carnivore”, *Ecology*  
494 *Letters*, 18/7: 660–7.
- 495 Altizer, S., Nunn, C. L., Thrall, P. H., Gittleman, J. L., Antonovics, J., Cunningham, A. A., Dobson, A. P.,  
496 Ezenwa, V., Jones, K. E., Pedersen, A. B., Poss, M., and Pulliam, J. R. (2003), “Social organization  
497 and parasite risk in mammals: Integrating theory and empirical studies”, *Annual Review of Ecology,*  
498 *Evolution, and Systematics*, 34/1: 517–47.

- 499 Ashby, B. and Farine, D. R. (2022), “Social information use shapes the coevolution of sociality and vir-  
500 ulence”, *bioRxiv : the preprint server for biology*.
- 501 Badyaev, A. V. and Uller, T. (2009), “Parental effects in ecology and evolution: Mechanisms, processes  
502 and implications”, *Philosophical Transactions of the Royal Society B: Biological Sciences*, 364/1520:  
503 1169–77.
- 504 Bailey, N. T. J. (1975), *The Mathematical Theory of Infectious Diseases and Its Applications* (2nd ed.,  
505 London: Griffin).
- 506 Bastille-Rousseau, G. and Wittemyer, G. (2019), “Leveraging multidimensional heterogeneity in re-  
507 source selection to define movement tactics of animals”, *Ecology Letters*, 22/9: 1417–27.
- 508 Bastos, A. D. S., Boshoff, C. I., Keet, D. F., Bengis, R. G., and Thomson, G. R. (2000), “Natural Trans-  
509 mission of Foot-and-Mouth Disease Virus between African Buffalo (*Syncerus caffer*) and Impala  
510 (*Aepyceros melampus*) in the Kruger National Park, South Africa”, *Epidemiology and Infection*, 124/  
511 3: 591–8.
- 512 Blehert, D. S., Hicks, A. C., Behr, M., Meteyer, C. U., Berlowski-Zier, B. M., Buckles, E. L., Coleman,  
513 J. T. H., Darling, S. R., Gargas, A., Niver, R., Okoniewski, J. C., Rudd, R. J., and Stone, W. B. (2009),  
514 “Bat white-nose syndrome: An emerging fungal pathogen?”, *Science (New York, N.Y.)*, 323/5911:  
515 227.
- 516 Bonds, M. H., Keenan, D. D., Leidner, A. J., and Rohani, P. (2005), “Higher disease prevalence can induce  
517 greater sociality: A game theoretic coevolutionary model”, *Evolution*, 59/9: 1859–66.
- 518 Cantor, M., Maldonado-Chaparro, A. A., Beck, K. B., Brandl, H. B., Carter, G. G., He, P., Hillemann, F.,  
519 Klarevas-Irby, J. A., Ogino, M., Papageorgiou, D., Prox, L., and Farine, D. R. (2021), “The importance  
520 of individual-to-society feedbacks in animal ecology and evolution”, *Journal of Animal Ecology*, 90/  
521 1: 27–44.
- 522 Carlson, C. J., Albery, G. F., Merow, C., Trisos, C. H., Zipfel, C. M., Eskew, E. A., Olival, K. J., Ross, N.,  
523 and Bansal, S. (2022), “Climate change increases cross-species viral transmission risk”, *Nature*: 1–1.
- 524 Chandler, J. C., Bevins, S. N., Ellis, J. W., Linder, T. J., Tell, R. M., Jenkins-Moore, M., Root, J. J., Lenocho,  
525 J. B., Robbe-Austerman, S., DeLiberto, T. J., Gidlewski, T., Kim Torchetti, M., and Shriner, S. A.  
526 (2021), “SARS-CoV-2 exposure in wild white-tailed deer (*Odocoileus virginianus*)”, *Proceedings of  
527 the National Academy of Sciences*, 118/47: e2114828118.
- 528 Dall, S. R. X., Giraldeau, L.-A., Olsson, O., McNamara, J. M., and Stephens, D. W. (2005), “Information  
529 and its use by animals in evolutionary ecology”, *Trends in Ecology & Evolution*, 20/4: 187–93.
- 530 Danchin, É., Giraldeau, L.-A., Valone, T. J., and Wagner, R. H. (2004), “Public information: From nosy  
531 neighbors to cultural evolution”, *Science*, 305/5683: 487–91.
- 532 DeAngelis, D. L. and Diaz, S. G. (2019), “Decision-making in agent-based modeling: A current review  
533 and future prospectus”, *Frontiers in Ecology and Evolution*, 6.
- 534 Eddelbuettel, D. (2013), *Seamless R and C++ Integration with Rcpp* (Use R!; New York: Springer-Verlag).
- 535 Ezenwa, V. O., Ghai, R. R., McKay, A. F., and Williams, A. E. (2016), “Group living and pathogen infec-  
536 tion revisited”, *Current Opinion in Behavioral Sciences*, Behavioral Ecology, 12: 66–72.
- 537 Fereidouni, S., Freimanis, G. L., Orynbayev, M., Ribeca, P., Flannery, J., King, D. P., Zuther, S., Beer, M.,  
538 Höper, D., Kydyrmanov, A., Karamendin, K., and Kock, R. (2019), “Mass die-off of Saiga antelopes,  
539 Kazakhstan, 2015”, *Emerging Infectious Diseases*, 25/6: 1169–76.

- 540 Fey, S. B., Siepielski, A. M., Nusslé, S., Cervantes-Yoshida, K., Hwan, J. L., Huber, E. R., Fey, M. J.,  
541 Catenazzi, A., and Carlson, S. M. (2015), “Recent shifts in the occurrence, cause, and magnitude of  
542 animal mass mortality events”, *Proceedings of the National Academy of Sciences*, 112/4: 1083–8.
- 543 Fortin, D., Beyer, H. L., Boyce, M. S., Smith, D. W., Duchesne, T., and Mao, J. S. (2005), “Wolves influence  
544 elk movements: Behavior shapes a trophic cascade in Yellowstone National Park”, *Ecology*, 86/5:  
545 1320–30.
- 546 Gartland, L. A., Firth, J. A., Laskowski, K. L., Jeanson, R., and Ioannou, C. C. (2021), “Sociability as a  
547 personality trait in animals: Methods, causes and consequences”, *Biological Reviews*, n/a/n/a.
- 548 Getz, W. M., Salter, R., Lyons, A. J., and Sippl-Swezey, N. (2015), “Panmictic and clonal evolution on a  
549 single patchy resource produces polymorphic foraging guilds”, *PLOS ONE* 10/8: e0133732–e0133732.
- 550 Gil, M. A., Hein, A. M., Spiegel, O., Baskett, M. L., and Sih, A. (2018), “Social information links individ-  
551 ual behavior to population and community dynamics”, *Trends in Ecology & Evolution*, 33/7: 535–  
552 48.
- 553 Goulson, D., Nicholls, E., Botías, C., and Rotheray, E. L. (2015), “Bee declines driven by combined stress  
554 from parasites, pesticides, and lack of flowers”, *Science*, 347/6229: 1255957.
- 555 Gupte, P. R., Netz, C. F. G., and Weissing, F. J. (2021), “The joint evolution of animal movement and  
556 competition strategies”, *bioRxiv*.
- 557 Guttal, V. and Couzin, I. D. (2010), “Social interactions, information use, and the evolution of collective  
558 migration”, *Proceedings of the National Academy of Sciences*, 107/37: 16172.
- 559 H5N8 and Related Influenza Viruses, T. G. C. for (2016), “Role for migratory wild birds in the global  
560 spread of avian influenza H5N8”, *Science*, 354/6309: 213–7.
- 561 Hamblin, S. (2013), “On the practical usage of genetic algorithms in ecology and evolution”, *Methods  
562 in Ecology and Evolution*, 4/2: 184–94.
- 563 Hofbauer, J. and Sigmund, K. (1988), *The Theory of Evolution and Dynamical Systems* (Cambridge [Eng-  
564 land]; New York: Cambridge University Press).
- 565 Hutchings, M. R., Kyriazakis, I., Papachristou, T. G., Gordon, I. J., and Jackson, F. (2000), “The herbi-  
566 vores’ dilemma: trade-offs between nutrition and parasitism in foraging decisions”, *Oecologia*, 124/  
567 2: 242–51.
- 568 Jesmer, B. R., Merkle, J. A., Goheen, J. R., Aikens, E. O., Beck, J. L., Courtemanch, A. B., Hurley, M. A.,  
569 McWhirter, D. E., Miyasaki, H. M., Monteith, K. L., and Kauffman, M. J. (2018), “Is ungulate migra-  
570 tion culturally transmitted? Evidence of social learning from translocated animals”, *Science*, 361/  
571 6406: 1023–5.
- 572 Jolles, A., Gorsich, E., Gubbins, S., Beechler, B., Buss, P., Juleff, N., de Klerk-Lorist, L.-M., Maree, F.,  
573 Perez-Martin, E., van Schalkwyk, O., Scott, K., Zhang, F., Medlock, J., and Charleston, B. (2021),  
574 “Endemic persistence of a highly contagious pathogen: Foot-and-mouth disease in its wildlife host”,  
575 *Science*, 374/6563: 104–9.
- 576 Keeling, M. J., Woolhouse, M. E. J., Shaw, D. J., Matthews, L., Chase-Topping, M., Haydon, D. T., Cornell,  
577 S. J., Kappey, J., Wilesmith, J., and Grenfell, B. T. (2001), “Dynamics of the 2001 UK Foot and Mouth  
578 Epidemic: Stochastic Dispersal in a Heterogeneous Landscape”, *Science*, 294/5543: 813–7.
- 579 Klump, B. C., Martin, J. M., Wild, S., Hörsch, J. K., Major, R. E., and Aplin, L. M. (2021), “Innovation  
580 and geographic spread of a complex foraging culture in an urban parrot”, *Science*, 373/6553: 456–60.

- 581 Kuchipudi, S. V., Surendran-Nair, M., Ruden, R. M., Yon, M., Nissly, R. H., Vandegrift, K. J., Nelli, R. K.,  
582 Li, L., Jayarao, B. M., Maranas, C. D., Levine, N., Willgert, K., Conlan, A. J. K., Olsen, R. J., Davis, J. J.,  
583 Musser, J. M., Hudson, P. J., and Kapur, V. (2022), “Multiple spillovers from humans and onward  
584 transmission of SARS-CoV-2 in white-tailed deer”, *Proceedings of the National Academy of Sciences*,  
585 119/6.
- 586 Kurvers, R. H. J. M., Krause, J., Croft, D. P., Wilson, A. D. M., and Wolf, M. (2014), “The evolutionary and  
587 ecological consequences of animal social networks: emerging issues”, *Trends in Ecology & Evolution*,  
588 29/6: 326–35.
- 589 Levi, T., Kilpatrick, A. M., Mangel, M., and Wilmers, C. C. (2012), “Deer, predators, and the emergence  
590 of Lyme disease”, *Proceedings of the National Academy of Sciences*, 109/27: 10942–7.
- 591 Lunn, T. J., Peel, A. J., McCallum, H., Eby, P., Kessler, M. K., Plowright, R. K., and Restif, O. (2021),  
592 “Spatial dynamics of pathogen transmission in communally roosting species: Impacts of changing  
593 habitats on bat-virus dynamics”, *Journal of Animal Ecology*, n/a/n/a.
- 594 Monk, J. D., Smith, J. A., Donadio, E., Perrig, P. L., Crego, R. D., Fileni, M., Bidder, O., Lambertucci, S. A.,  
595 Pauli, J. N., Schmitz, O. J., and Middleton, A. D. (2022), “Cascading effects of a disease outbreak in  
596 a remote protected area”, *Ecology Letters*, n/a/n/a.
- 597 Netz, C. F. G., Hildenbrandt, H., and Weissing, F. J. (2021), “Complex eco-evolutionary dynamics in-  
598 duced by the coevolution of predator–prey movement strategies”, *Evolutionary Ecology*.
- 599 Poulin, R. and Fillion, A. (2021), “Evolution of social behaviour in an infectious world: Comparative  
600 analysis of social network structure versus parasite richness”, *Behavioral Ecology and Sociobiology*,  
601 75/7: 105.
- 602 Prado, F., Sheih, A., West, J. D., and Kerr, B. (2009), “Coevolutionary cycling of host sociality and  
603 pathogen virulence in contact networks”, *Journal of Theoretical Biology*, 261/4: 561–9.
- 604 Pusceddu, M., Cini, A., Alberti, S., Salaris, E., Theodorou, P., Floris, I., and Satta, A. (2021), “Honey  
605 bees increase social distancing when facing the ectoparasite varroa destructor”, *Science Advances*,  
606 7/44: eabj1398.
- 607 R Core Team (2020), *R: A Language and Environment for Statistical Computing* (manual; Vienna, Aus-  
608 tria: R Foundation for Statistical Computing).
- 609 Romano, V., MacIntosh, A. J. J., and Sueur, C. (2020), “Stemming the flow: Information, infection, and  
610 social evolution”, *Trends in Ecology & Evolution*, 35/10: 849–53.
- 611 Romano, V., Sueur, C., and MacIntosh, A. J. J. (2021), “The tradeoff between information and pathogen  
612 transmission in animal societies”, *Oikos*, n/a/n/a.
- 613 Ruxton, G. D., Gurney, W. S. C., and de Roos, A. M. (1992), “Interference and generation cycles”, *The-  
614 oretical Population Biology*, 42/3: 235–53.
- 615 Sah, P., Mann, J., and Bansal, S. (2018), “Disease implications of animal social network structure: A  
616 synthesis across social systems”, *Journal of Animal Ecology*, 87/3: 546–58.
- 617 Sanderson, C. E. and Alexander, K. A. (2020), “Uncharted waters: Climate change likely to intensify  
618 infectious disease outbreaks causing mass mortality events in marine mammals”, *Global Change  
619 Biology*, 26/8: 4284–301.

- 620 Scheele, B. C., Pasmans, F., Skerratt, L. F., Berger, L., Martel, A., Beukema, W., Acevedo, A. A., Burrowes,  
621 P. A., Carvalho, T., Catenazzi, A., De la Riva, I., Fisher, M. C., Flechas, S. V., Foster, C. N., Frías-  
622 Álvarez, P., Garner, T. W. J., Gratwicke, B., Guayasamin, J. M., Hirschfeld, M., Kolby, J. E., Kosch,  
623 T. A., La Marca, E., Lindenmayer, D. B., Lips, K. R., Longo, A. V., Maneyro, R., McDonald, C. A.,  
624 Mendelson, J., Palacios-Rodriguez, P., Parra-Olea, G., Richards-Zawacki, C. L., Rödel, M.-O., Rovito,  
625 S. M., Soto-Azat, C., Toledo, L. F., Voyles, J., Weldon, C., Whitfield, S. M., Wilkinson, M., Zamudio,  
626 K. R., and Canessa, S. (2019), “Amphibian fungal panzootic causes catastrophic and ongoing loss  
627 of biodiversity”, *Science (New York, N.Y.)*, 363/6434: 1459–63.
- 628 Scherer, C., Radchuk, V., Franz, M., Thulke, H.-H., Lange, M., Grimm, V., and Kramer-Schadt, S. (2020),  
629 “Moving infections: Individual movement decisions drive disease persistence in spatially structured  
630 landscapes”, *Oikos*, 129/5: 651–67.
- 631 Spiegel, O., Leu, S. T., Bull, C. M., and Sih, A. (2017), “What’s your move? Movement as a link between  
632 personality and spatial dynamics in animal populations”, *Ecology Letters*, 20/1: 3–18.
- 633 Stockmaier, S., Stroeymeyt, N., Shattuck, E. C., Hawley, D. M., Meyers, L. A., and Bolnick, D. I. (2021),  
634 “Infectious diseases and social distancing in nature”, *Science*, 371/6533: eabc8881.
- 635 Stroeymeyt, N., Grasse, A. V., Crespi, A., Mersch, D. P., Cremer, S., and Keller, L. (2018), “Social network  
636 plasticity decreases disease transmission in a eusocial insect”, *Science (New York, N.Y.)*, 362/6417:  
637 941–5.
- 638 Tanner, C. J. and Jackson, A. L. (2012), “Social structure emerges via the interaction between local  
639 ecology and individual behaviour”, *Journal of Animal Ecology*, 81/1: 260–7.
- 640 Travis, J. M. J., Murrell, D. J., and Dytham, C. (1999), “The evolution of density-dependent dispersal”,  
641 *Proceedings of the Royal Society of London. Series B: Biological Sciences*, 266/1431: 1837–42.
- 642 Vosloo, W., Thompson, P. N., Botha, B., Bengis, R. G., and Thomson, G. R. (2009), “Longitudinal study  
643 to investigate the role of impala (*Aepyceros melampus*) in foot-and-mouth disease maintenance in  
644 the Kruger National Park, South Africa”, *Transboundary and Emerging Diseases*, 56/1-2: 18–30.
- 645 Webber, Q. M. R., Albery, G., Farine, D. R., Pinter-Wollman, N., Sharma, N., Spiegel, O., Wal, E. V., and  
646 Manlove, K. (2022), “Behavioural ecology at the spatial-social interface”, *EcoEvoRxiv*.
- 647 Webber, Q. M. R. and Vander Wal, E. (2018), “An evolutionary framework outlining the integration of  
648 individual social and spatial ecology”, *Journal of Animal Ecology*, 87/1: 113–27.
- 649 Weinstein, S. B., Buck, J. C., and Young, H. S. (2018), “A landscape of disgust”, *Science*, 359/6381: 1213–  
650 4.
- 651 White, L. A., Forester, J. D., and Craft, M. E. (2017), “Using contact networks to explore mechanisms of  
652 parasite transmission in wildlife”, *Biological Reviews*, 92/1: 389–409.
- 653 — (2018a), “Covariation between the physiological and behavioral components of pathogen trans-  
654 mission: host heterogeneity determines epidemic outcomes”, *Oikos*, 127/4: 538–52.
- 655 — (2018b), “Disease outbreak thresholds emerge from interactions between movement behavior,  
656 landscape structure, and epidemiology”, *Proceedings of the National Academy of Sciences*, 115/28:  
657 7374–9.
- 658 Whitehead, H. (2008), *Analyzing Animal Societies: Quantitative Methods for Vertebrate Social Analysis*  
659 (University of Chicago Press).



- 660 Wilber, M. Q., Yang, A., Boughton, R., Manlove, K. R., Miller, R. S., Pepin, K. M., and Wittemyer, G.  
661 (2022), “A model for leveraging animal movement to understand spatio-temporal disease dynam-  
662 ics”, *Ecology Letters*, n/a/n/a.
- 663 Wille, M. and Barr, I. G. (2022), “Resurgence of avian influenza virus”, *Science*, 376/6592: 459–60.
- 664 Wolf, M. and Weissing, F. J. (2012), “Animal personalities: Consequences for ecology and evolution”,  
665 *Trends in Ecology & Evolution*, 27/8: 452–61.
